# Supplementary material for: Knowledge and practice of cervical cancer screening and associated factors among reproductive age group women in districts of Gurage zone, Southern Ethiopia. A cross-sectional study
Source: PLOS journal article supplement (doi:10.1371/journal.pone.0238869), 2020-09-18
Supplement: S2 (10.1371/journal.pone.0238869.s002) [file journal.pone.0238869.s002]

## **Appendix**

### **English version participant information sheet**

Greeting: Good morning/afternoon!!

My name is.....I am working as a data collector for the study entitled Knowledge and practice of cervical cancer screening and associated factors among reproductive age group women in districts of Gurage zone, Southern Ethiopia, 2019. Now you are randomly selected for this study and I kindly request you to lend me your attention to explain about the study and being selected as the study participants.

**The Study Title:** Knowledge and practice of cervical cancer screening and associated factors among reproductive age group women in districts of Gurage zone, Southern Ethiopia, 2019

**Name of the organization:** Wolkite University, College of Medicine and Health Sciences, Department of Midwifery.

**Introduction:** Information sheet and consent form is prepared for reproductive age group who will be volunteer to participate in research project, community based cross-sectional study will be conducted to assess cervical screening status at this community.

#### **Purpose/aim of the study:**

The finding of this study can be of a paramount importance for the Zonal Health Bureau and other concerned bodies to plan different programs for the purpose of decreasing maternal morbidity and mortality related to cervical cancer by knowing the gaps.

#### **Procedure and duration:**

To assess women's cervical cancer screening status, you are invited to take part in this project. If you are willing to participate in this project, you need to understand and say "yes" on the agreement form. Then after, I will interview you and fill using structured questionnaires. There are 37 Questionnaires it will take about 30 minute to answer it, so I kindly request you to spare me this time for the interview.

**Risk/ Discomfort:** The risk of being participating in this study is very minimal, but you may feel some discomfort especially on spending time about 30 Minutes. We hope you will participate in

the study for the sake of the Benefit of the research result. I am sure there is no risk in participating in this research project.

**Benefits/incentives, payments:** There will not be any direct payment for participating in this study. But the findings will help us to identify the gap and take the appropriate intervention by the authorized stakeholders. You will not be provided any incentive or payment to take part in this project.

**Confidentiality:** The information you will provide us will be confidential. There will be no information that will identify you in particular. The findings of the study will be general for the study population and will not reflect any thing particular of individual persons. The questionnaire will be coded to exclude showing names. No reference will be made in oral or written reports that could link participants to the research.

**Right to refuse or withdraw:** Participation for this study is fully voluntary. You have the right to declare participate or not to participate in this study. If you decide to participate, you have the right to withdraw from the study at any time and this will not label you for any loss of benefits which you otherwise are entitled you do not have answer any questions that you do not want to answer.

**Contact Address:**

If there are any questions or enquiries any time about the study or the procedure, please **contact:**

Mobile Phone: 0921788975 or **Email Address:**[danieladane178@yahoo.com](mailto:danieladane178@yahoo.com)

**Appendix 1: English version participant consent form**

I have read/ was read to me the participant information sheet. I have clearly understood the propose of the research, the procedures, the risk and benefits, issues of confidentiality, the rights of participating and the contact address of any queries. I have been given the opportunity to ask questions for the things that may have been unclear. I was informed that I have the right to withdraw from the study at any time or not to answer any questions that I do not want. Therefore, I declare my voluntary consent to participate in this study.

Volunteer to participate: **Yes** ☐ **No** ☐

If participant does not agree to be interviewed thanks him/her and go to the next participant.

If respondent say **yes** continue.

### Appendix 3: English version questionnaire

This is a data collection format to assess knowledge and practice of cervical cancer screening and associated factors among reproductive age group women in Gurage zone, Southern Ethiopia, 2019.

Name of Data collector: ----- Qualification: -----

Time Interview Started: Hour: \_\_\_\_\_ Minute: \_\_\_\_\_ Ended: Hour: \_\_\_\_\_ Minute: \_\_\_\_\_

Questionnaire No \_\_\_\_\_

Date \_\_\_\_/\_\_\_\_/\_\_\_\_ E.C. signature \_\_\_\_\_

#### Data Collector agreement

“I certify that I have filled the questionnaire in accordance with the training that is given to me and instructions stated in it. I have confirmed that the information in it is correct.”

Signature \_\_\_\_\_ Date \_\_\_\_/\_\_\_\_/\_\_\_\_ E.C

Name of kebeles \_\_\_\_\_ Code \_\_\_\_\_

Checked by supervisor for completeness: Supervisor Name \_\_\_\_\_ signature \_\_\_\_\_

Date \_\_\_\_/\_\_\_\_/\_\_\_\_ E.C.

Table 1: questionnaires to assess Knowledge and practice of cervical cancer screening and associated factors among reproductive age group women in districts of Gurage zone, Southern Ethiopia, 2019.

| Circle and write the appropriate response accordingly     |                           |                                                                            |        |
|-----------------------------------------------------------|---------------------------|----------------------------------------------------------------------------|--------|
| PART I:- Socio-demographic characteristics of respondents |                           |                                                                            |        |
| S. No                                                     | Questions                 | Response                                                                   | Remark |
| 001                                                       | Age group of participants | Age in completed years _____                                               |        |
| 002                                                       | Marital status            | 1. Single<br>2. Married<br>3. Divorced<br>4. Widowed<br>5. Other (specify) |        |
| 003                                                       | Ethnicity                 | 1. Gurage<br>2. Oromo<br>3. Amhara<br>4. Kembata<br>5. Others (specify)    |        |
| 004                                                       | Religion                  | 1. Catholic<br>2. Protestant<br>3. Muslim<br>4. Orthodox                   |        |

|     |                    |                                                                                           |                                       |
|-----|--------------------|-------------------------------------------------------------------------------------------|---------------------------------------|
| 005 | Work               | 1. Farmer<br>2. House wife<br>3. Government Employee<br>4. Merchant<br>5. Others(specify) |                                       |
| 006 | Monthly income     | Ethiopian birr-----                                                                       |                                       |
| 007 | Educational status | 1. Educated<br>2. Uneducated                                                              | If Uneducated skip to Question No 009 |
| 008 | Educational level  | 1. Primary education<br>2. Secondary education<br>3. Diploma<br>4. Degree and above       |                                       |

### Part II:- Reproductive characteristics of respondents

|     |                                                                          |                                                                                                |                                 |
|-----|--------------------------------------------------------------------------|------------------------------------------------------------------------------------------------|---------------------------------|
| 009 | Age of Menarche                                                          | Age in completed years-----                                                                    |                                 |
| 010 | Sex condition                                                            | 1. Yes<br>2. No                                                                                | If answer is No skip to Q No 12 |
| 011 | Age at first sex                                                         | In completed years-----                                                                        |                                 |
| 012 | Contraceptive history                                                    | 1. Yes<br>2. No                                                                                | If answer is No skip to Q No 14 |
| 013 | What type of family planning used?<br>(more than one answer is possible) | 1. Pills<br>2. Injectables<br>3. Implants<br>4. Intrauterine contraceptive device<br>5. Condom |                                 |
| 014 | Nature of menses                                                         | 1. Regular<br>2. Sometimes irregular<br>3. Always irregular<br>4. No menses                    |                                 |
| 015 | History of abortion                                                      | 1. Yes<br>2. No                                                                                |                                 |
| 016 | Family history of cervical cancer                                        | 1. Yes<br>2. No                                                                                |                                 |

### Part III:- Knowledge related questions

|     |                                                                               |                                                                                                                                              |                                 |
|-----|-------------------------------------------------------------------------------|----------------------------------------------------------------------------------------------------------------------------------------------|---------------------------------|
| 017 | Have you heard of cervical cancer?                                            | 1. Yes<br>2. No                                                                                                                              | If answer is No skip to Q No 19 |
| 018 | Source of information? (more than one answer is possible)                     | 1. From media<br>2. Broachers and printed materials<br>3. Health workers<br>4. Family, friends, neighbors<br>5. Others (please specify)----- |                                 |
| 019 | What cervical cancer symptoms do you know? (more than one answer is possible) | 1. Vaginal bleeding<br>2. Vaginal foul-smelling discharge<br>3. I don't know<br>4. Post-coital bleeding                                      |                                 |
| 020 | What are the risk factors for cancer of the                                   | 1. Having multiple sexual partners                                                                                                           |                                 |

|     |                                                                                                 |                                                                                                                                                                                                     |  |
|-----|-------------------------------------------------------------------------------------------------|-----------------------------------------------------------------------------------------------------------------------------------------------------------------------------------------------------|--|
|     | cervix? (more than one answer is possible)                                                      | 2. Early sexual intercourse<br>3. Cigarette smoking<br>4. Acquiring Human Papilloma Virus<br>5. I do not know<br>6. Others(specify)-----                                                            |  |
| 021 | How can cervical cancer be prevented? (more than one answer is possible)                        | 1. Through minimizing multiple sexual partners<br>2. Through avoiding early sexual intercourse<br>3. Through abandon smoking<br>4. Through vaccination of Human Papilloma Virus<br>5. I do not know |  |
| 022 | Can cancer of the cervix be cured at the first stage                                            | 1. Yes<br>2. No<br>3. I do not know                                                                                                                                                                 |  |
| 023 | How can someone with cancer of the cervix be treated? (more than one answer is possible)        | 1. Herbal remedies<br>2. Surgery<br>3. Specific drugs are given by the hospital<br>4. Radiotherapy<br>5. I do not know                                                                              |  |
| 024 | How expensive do you think cancer of the cervix treatment is in this country is in this country | 1. It is free of charge<br>2. It is reasonably priced<br>3. Moderately expensive<br>4. It is very expensive<br>5. I do not know                                                                     |  |
| 025 | Do you know that there is cervical cancer screening?                                            | 1. Yes<br>2. No                                                                                                                                                                                     |  |
| 026 | How frequent is screening for cervical cancer performed?                                        | 1. Once every year<br>2. Once every three years<br>3. Once every 5 years<br>4. I do not know                                                                                                        |  |
| 027 | Can you mention any of the procedures used in screening for cervical cancer?                    | 1. Pap Smear<br>2. I do not know<br>3. Visual Inspection with Acetic Acid<br>4. Others (specify)-----                                                                                               |  |

#### Part IV:- Practice related questions

|     |                                                  |                                                             |                        |
|-----|--------------------------------------------------|-------------------------------------------------------------|------------------------|
| 028 | Have you ever screened for cancer of the cervix? | 1. Yes<br>2. No                                             | If no skip to Q No 031 |
| 029 | If yes how many times you screened?              | 1. Once<br>2. More than once                                |                        |
| 030 | When was the last time you screened?             | 1. Within the past three years<br>2. Before three years ago |                        |

|                                                                    |                                                                                                 |                                                                                                                                                                                                                                                                             |  |
|--------------------------------------------------------------------|-------------------------------------------------------------------------------------------------|-----------------------------------------------------------------------------------------------------------------------------------------------------------------------------------------------------------------------------------------------------------------------------|--|
| 031                                                                | What were barriers to have cervical cancer screening?                                           | 1. The screening places are too far from where I live<br>2. I think the price is expensive<br>3. There are no health education programs to promote screening<br>4. I am afraid a screening test would reveal cervical cancer positive.<br>5. Others ( <b>Specify</b> )..... |  |
| 032                                                                | Do you have a future plan to screen Cervical cancer ?                                           | 1. Yes<br>2. No                                                                                                                                                                                                                                                             |  |
| <b>Part V:- Lifestyle and sexual related to behavior questions</b> |                                                                                                 |                                                                                                                                                                                                                                                                             |  |
| 033                                                                | Have you ever smoked?                                                                           | 1. Yes<br>2. No                                                                                                                                                                                                                                                             |  |
| 034                                                                | Have you ever been told you that you had a pelvic infection or treated by health professionals? | 1. Yes<br>2. No                                                                                                                                                                                                                                                             |  |
| 035                                                                | Have you had a sexual transmitted infection in your life time?                                  | 1. Yes<br>2. No                                                                                                                                                                                                                                                             |  |
| 036                                                                | Does your partner ever have history of STD?                                                     | 1. Yes<br>2. No                                                                                                                                                                                                                                                             |  |
| 037                                                                | How many sexual partners have you had in your life time?                                        | -----                                                                                                                                                                                                                                                                       |  |
